# Supplementary material for: Commissioning of self-management support for people with long-term conditions: an exploration of commissioning aspirations and processes
Source: PubMed Central journal article supplement (PMC4964251; doi:10.1136/bmjopen-2015-010853), 2016-07-15
Supplement: bmjopen-2015-010853supp2.pdf [file bmjopen-2015-010853supp2.pdf]

**Supplementary document 2: Good & Bad Practice recommendations from service-user researcher's observations at CCG board meetings**

**Good Practice**

| Theme          | Feedback                                                                                                                                                                                                                                                                                           |
|----------------|----------------------------------------------------------------------------------------------------------------------------------------------------------------------------------------------------------------------------------------------------------------------------------------------------|
| Engagement     | Interactive and engaging meetings which provided Public seminars, and encouraged discussion, as well as succinct board papers.                                                                                                                                                                     |
| Being welcomed | <p>Engaging, passionate and friendly Chair (i.e. where they acknowledged the effort of the staff behind the reports), gives good impression</p> <p>Demonstrable enthusiasm/dedication from board members</p> <p>Use of humour – made the CCGs appear “more human”</p>                              |
| Agenda items   | <p>Time for questions to the Board – some opportunity for engagement</p> <p>Clear, succinct agendas and papers, including glossary or acronyms, colour coded papers/packs = helpful, use of tabs to separate agenda items</p> <p>Chair giving very brief summary of next agenda in ‘lay terms’</p> |
| Environment    | <p>Clear sound system, in accessible venue and location</p> <p>Clear signage, information and advertisement of meeting</p> <p>Plentiful refreshments</p>                                                                                                                                           |

**What is missing (questions that arose)**

|                                        |                                                                                                                                                                                                  |
|----------------------------------------|--------------------------------------------------------------------------------------------------------------------------------------------------------------------------------------------------|
| What is missing (questions that arose) | <p>What is the purpose? Accountability?</p> <p>Big issue around non evidence of self-management support</p> <p>Where do you go, as a member of the public who wants to have a say/influence?</p> |
|----------------------------------------|--------------------------------------------------------------------------------------------------------------------------------------------------------------------------------------------------|

**Bad Practice**

|              |                                                                                                                                                                                       |
|--------------|---------------------------------------------------------------------------------------------------------------------------------------------------------------------------------------|
| Intimidating | <p>Needs less intimidating atmosphere and less daunting language, and smaller, colour coded papers</p> <p>Can feel awkward (it was like they weren't expecting us”), feeling like</p> |
|--------------|---------------------------------------------------------------------------------------------------------------------------------------------------------------------------------------|

|                                                                                                 |                                                                                                                                                                                                                                                                                                                                                                                                                                                                                                                                                                     |
|-------------------------------------------------------------------------------------------------|---------------------------------------------------------------------------------------------------------------------------------------------------------------------------------------------------------------------------------------------------------------------------------------------------------------------------------------------------------------------------------------------------------------------------------------------------------------------------------------------------------------------------------------------------------------------|
| <p>Boring (due to being; dull, difficult to understand, difficult to follow, “medic” speak)</p> | <p>you stand out, “Why are you here” (common question posed by board members to SURs) could be intimidating, Off-putting signs i.e. private meeting</p> <p>First meeting difficult to follow and understand (Can feel like a secret code/language that you have to learn), agenda too long and difficult to follow, Board members speak in medic jargon, or in a monotone</p> <p>Deluge of financial info (too much to assimilate)</p> <p>When are decisions actually made? Most of the meetings appeared to be conducted beforehand – rubber stamping exercise</p> |
| <p>Practicalities</p>                                                                           | <p>No refreshments</p> <p>No signage – where to go? No parking (troublesome and costly to attend)</p>                                                                                                                                                                                                                                                                                                                                                                                                                                                               |

---
