# Supplementary material for: Commissioning of self-management support for people with long-term conditions: an exploration of commissioning aspirations and processes
Source: PubMed Central journal article supplement (PMC4964251; doi:10.1136/bmjopen-2015-010853), 2016-07-15

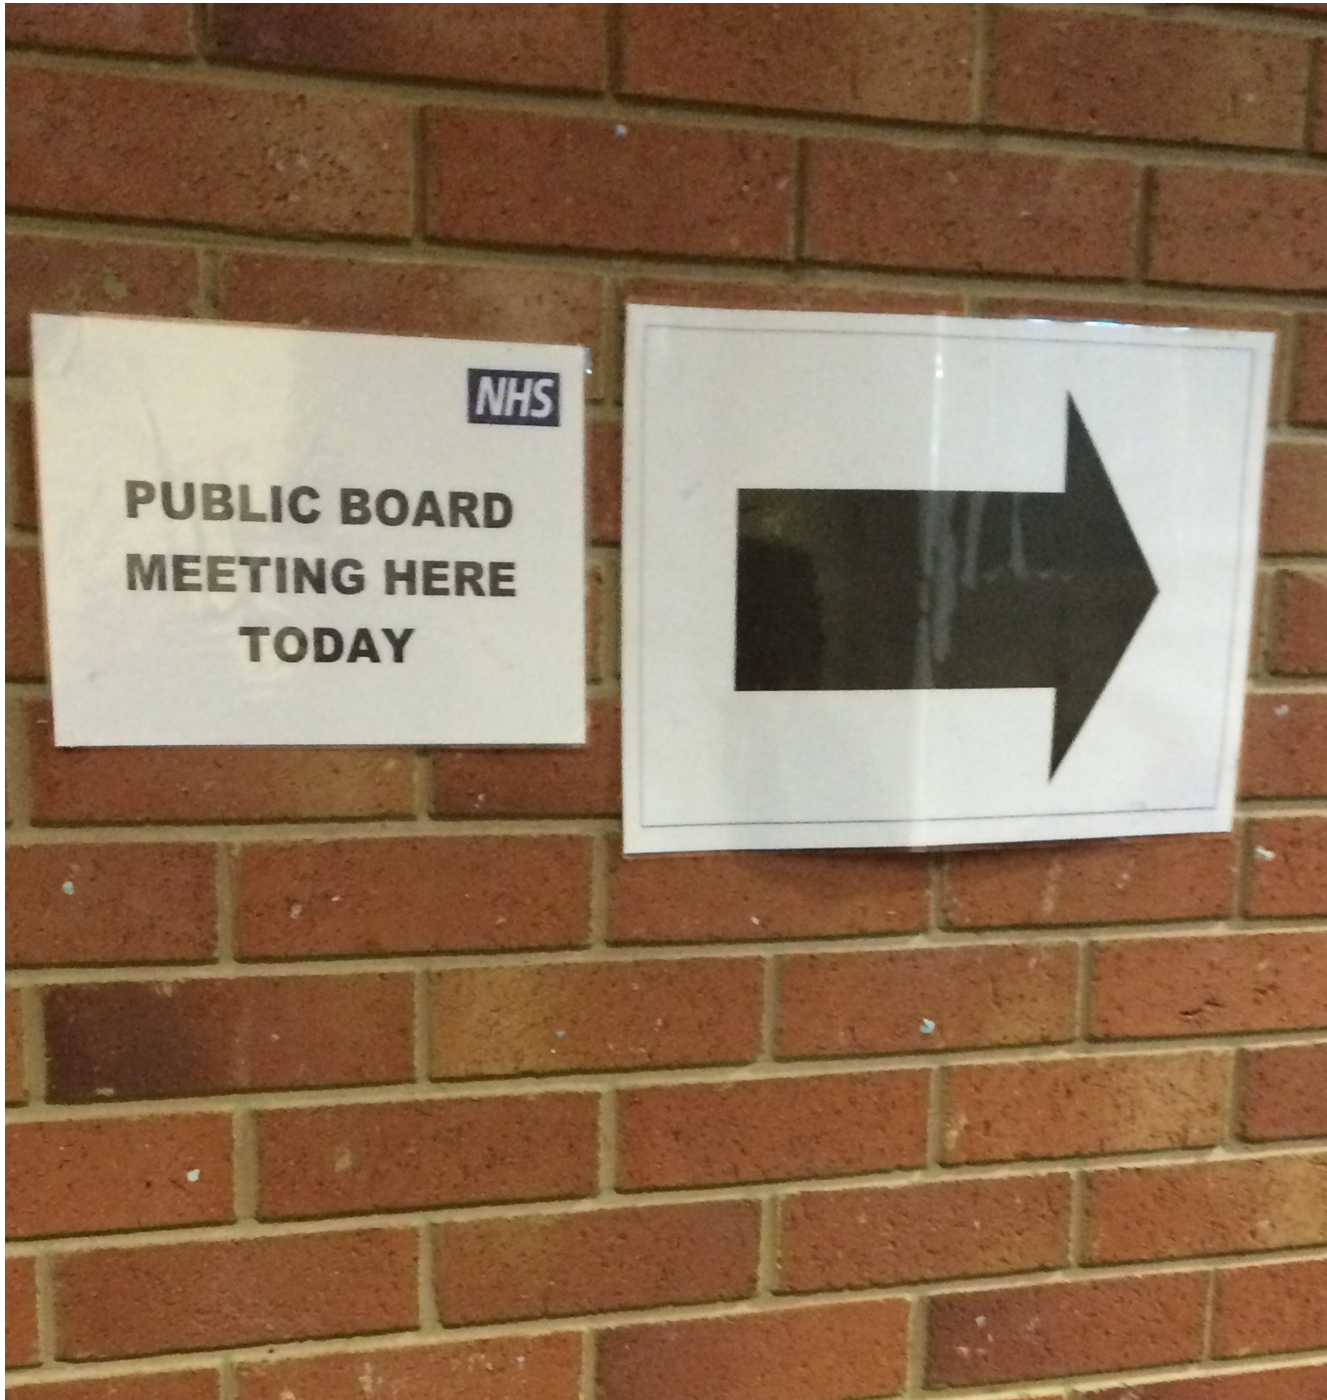

**NHS**

**PUBLIC BOARD  
MEETING HERE  
TODAY**

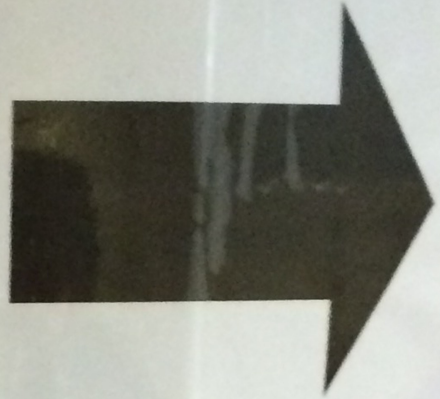

Supplement: bmjopen-2015-010853supp4.pdf [file bmjopen-2015-010853supp4.pdf]
